# Supplementary material for: A d-2-hydroxyglutarate biosensor based on specific transcriptional regulator DhdR
Source: PubMed Central journal article supplement (PMC8651671; doi:10.1038/s41467-021-27357-7), 2021-12-07
Supplement: 41467_2021_27357_MOESM3_ESM.pdf [file 41467_2021_27357_MOESM3_ESM.pdf]

**File name:** Supplementary Data 1

**Description:** Strains and plasmids used in this study.

**File name:** Supplementary Data 2

**Description:** Oligonucleotides used in this study.
